# Supplementary material for: Explorative–descriptive study on the effects of COVID-19 on access to antiretroviral therapy services: the case of a teaching hospital in Ghana
Source: PubMed Central journal article supplement — BMJ Open. 2022 May 20;12(5):e056386. doi: 10.1136/bmjopen-2021-056386 (PMC9125379; doi:10.1136/bmjopen-2021-056386), 2022-05-20
Supplement: bmjopen-2021-056386supp002.pdf [file bmjopen-2021-056386supp002.pdf]

## REPORTING CHECKLIST FOR QUALITATIVE STUDY BASED ON SRQR GUIDELINES

|                 | REPORTING ITEM                                                                                                                                                                                                                                                                                                                                                                                                                                                                                                                                                                                                                                                                                                                                                                                                                                                                                                                                                                                                                                                                                                                                                                                                                                                                                                                                                                                                                                                                                                                                                                                                                                                                                                                                                                                | PAGE NUMBER |
|-----------------|-----------------------------------------------------------------------------------------------------------------------------------------------------------------------------------------------------------------------------------------------------------------------------------------------------------------------------------------------------------------------------------------------------------------------------------------------------------------------------------------------------------------------------------------------------------------------------------------------------------------------------------------------------------------------------------------------------------------------------------------------------------------------------------------------------------------------------------------------------------------------------------------------------------------------------------------------------------------------------------------------------------------------------------------------------------------------------------------------------------------------------------------------------------------------------------------------------------------------------------------------------------------------------------------------------------------------------------------------------------------------------------------------------------------------------------------------------------------------------------------------------------------------------------------------------------------------------------------------------------------------------------------------------------------------------------------------------------------------------------------------------------------------------------------------|-------------|
| <b>Title</b>    | An explorative-descriptive study on the effects of COVID-19 on Access to ART services in a Ghanaian Teaching Hospital                                                                                                                                                                                                                                                                                                                                                                                                                                                                                                                                                                                                                                                                                                                                                                                                                                                                                                                                                                                                                                                                                                                                                                                                                                                                                                                                                                                                                                                                                                                                                                                                                                                                         | 1           |
| <b>Abstract</b> | <p><b>Objective</b><br/>To explore how the COVID-19 pandemic affected access to ART services from the perspective of the PLWH.</p> <p><b>Design</b><br/>The study utilised an exploratory-descriptive qualitative design. In-depth interview was the technique employed during data collection. Data was analysed using conceptual content analysis following the traditions of Elo and Kyngäs on deductive and Hsieh on inductive content analysis.</p> <p><b>Setting</b><br/>ART clinic, Cape Coast Teaching Hospital, Ghana.</p> <p><b>Participants</b><br/>Twelve participants who have at least one year of history of accessing ART care before the COVID-19 pandemic and at least one clinic visit during the pandemic were purposively sampled from the ART clinic.</p> <p><b>Results</b><br/>Five concepts of accessing health care were explored: Accessibility, Availability, Affordability, Accommodation and Acceptability. The ART unit in the study setting remained open for service delivery throughout the pandemic. However, the fear of contracting the virus while patronising the ART services affected the participants' decision to utilise the facility. Although all the participants in this study reportedly honoured all their refill appointments, they indicated knowledge of other PLWH defaulting. With reference to the availability of resources, a shortage of ARVs was reported, affecting the refill appointment intervals. In spite of the challenges, several strategies were implemented to accommodate the patients' needs while protecting them from contracting the virus by instituting the stipulated COVID-protocols. The study found that some of the strategies impacted the acceptability and affordability of the services as the cost</p> | 2-3         |

|                                                                         |                                                                                                                                                                                                                                                                                                                                                                                                                                                                                                                                                                                                                                                                                                                                                                                                                                                                                                                                                                                                                                                                                                                                                                                                                                                                                                                                                                                                                                                                                                                                                                                |   |
|-------------------------------------------------------------------------|--------------------------------------------------------------------------------------------------------------------------------------------------------------------------------------------------------------------------------------------------------------------------------------------------------------------------------------------------------------------------------------------------------------------------------------------------------------------------------------------------------------------------------------------------------------------------------------------------------------------------------------------------------------------------------------------------------------------------------------------------------------------------------------------------------------------------------------------------------------------------------------------------------------------------------------------------------------------------------------------------------------------------------------------------------------------------------------------------------------------------------------------------------------------------------------------------------------------------------------------------------------------------------------------------------------------------------------------------------------------------------------------------------------------------------------------------------------------------------------------------------------------------------------------------------------------------------|---|
|                                                                         | <p>of transportation increased. Varying levels of accessibility to health workers providing ART services in the study setting was also recorded.</p> <p><b>Conclusion</b></p> <p>Strategies were implemented to accommodate the effects of the pandemic on ART provision. However, these had deficiencies that must be addressed using appropriate DSD interventions. This will ensure continuous access to service delivery in the ongoing and any similar future occurrences.</p>                                                                                                                                                                                                                                                                                                                                                                                                                                                                                                                                                                                                                                                                                                                                                                                                                                                                                                                                                                                                                                                                                            |   |
| <b>Introduction</b>                                                     |                                                                                                                                                                                                                                                                                                                                                                                                                                                                                                                                                                                                                                                                                                                                                                                                                                                                                                                                                                                                                                                                                                                                                                                                                                                                                                                                                                                                                                                                                                                                                                                |   |
| <ul style="list-style-type: none"> <li>• Problem formulation</li> </ul> | <p>People Living with HIV (PLWH) depend on an uninterrupted supply of antiretroviral (ARV), drugs and other health services to maintain their health. The outbreak of COVID in 2019, however, had a negative impact on global health systems, programs, and targets (1). The Centre for Disease Control (CDC) reported that the coronavirus was highly contagious and spread rapidly (2,3). Hence, social distancing, wearing face masks, and continual handwashing among others, were recommended to stop the transmission (4). In response, many countries, including Ghana locked down at various periods and introduced strict measures to reduce the spread of the virus (5,6).</p> <p>The World Health Organization (WHO) has reported that in the wake of the persistent fear of infection, misinformation and restriction on movement globally, patients' uptake of health services, including those related to HIV/AIDS care, will be negatively affected by the COVID-19 pandemic (7). It was estimated that a six-month disruption in ART supply in sub-Saharan Africa during the pandemic would increase the rate of HIV-related death by half a million and roll back the gains made (8) towards the elimination of HIV by 2030. Ghana has a generalised HIV epidemic, and the national response has focused on attaining the 95 95 95 targets, which require increasing uptake of HIV screening, linkage to care and ensuring virologic suppression. Studies have looked at the impact of the pandemic on wellbeing, coping and other aspects of the life of</p> | 4 |

|                                              |                                                                                                                                                                                                                                                                                                                                                                                                                                                                                                                                                                                                                                                                                                                                                                                                                                                                                                   |     |
|----------------------------------------------|---------------------------------------------------------------------------------------------------------------------------------------------------------------------------------------------------------------------------------------------------------------------------------------------------------------------------------------------------------------------------------------------------------------------------------------------------------------------------------------------------------------------------------------------------------------------------------------------------------------------------------------------------------------------------------------------------------------------------------------------------------------------------------------------------------------------------------------------------------------------------------------------------|-----|
|                                              | Ghanaians (9,10), but none to our knowledge has addressed issues related to healthcare services for PLWH. Since HIV services including antiretroviral therapy (ART) in Ghana, is still mainly facility-based, This study, therefore, aims to explore the influence of the COVID-19 pandemic on access to ART services from the perspective of PLWH.                                                                                                                                                                                                                                                                                                                                                                                                                                                                                                                                               |     |
| • Purpose or research question               | This study there aims to explores the influence of the COVID-19 pandemic on access to ART services from the perspective of PLWH.                                                                                                                                                                                                                                                                                                                                                                                                                                                                                                                                                                                                                                                                                                                                                                  | 4   |
| <b>Methods</b>                               |                                                                                                                                                                                                                                                                                                                                                                                                                                                                                                                                                                                                                                                                                                                                                                                                                                                                                                   |     |
| • Qualitative approach and research paradigm | An exploratory-descriptive qualitative design. This design was suitable as it allowed investigation into an area which has not been extensively studied. The five concepts of accessing health care proposed by Penchansky & Thomas (1981) as a lens to identify patterns:<br><i>Accessibility</i> : refers to geographic accessibility which is determined by how easily clients can reach health facility.<br><i>Affordability</i> : assesses the cost of accessing ART care.<br><i>Availability</i> : measures the extent to which the provider has the requisite resources to meet the needs of the client.<br><i>Accommodation</i> : reflects the extent to which the provider's operation is organised to meet the constraints and preferences of the client.<br><i>Acceptability</i> : determines the extent to which the client is comfortable with the characteristics of the providers. | 4/5 |
| • Researcher characteristics and reflexivity | The researchers are all trained health professionals who have expertise and publications in qualitative research methods. They have all worked in various capacities in the PMTCT/ART clinic for a cumulative 45 years. The PI and four other co-authors are trained at the PhD level and were adequately equipped to undertake the study.                                                                                                                                                                                                                                                                                                                                                                                                                                                                                                                                                        | N/A |
| • Context                                    | ART services at the Cape Coast Teaching Hospital in Ghana. The hospital was selected because it has adequate facilities and provides care to the general public recording and recording over 3000 patients. The Unit also serves as the referral centre for all HIV clinics in the region.                                                                                                                                                                                                                                                                                                                                                                                                                                                                                                                                                                                                        | 4/5 |

|                                                                                                  |                                                                                                                                                                                                                                                                                                                                                                                                                                                                                                            |    |
|--------------------------------------------------------------------------------------------------|------------------------------------------------------------------------------------------------------------------------------------------------------------------------------------------------------------------------------------------------------------------------------------------------------------------------------------------------------------------------------------------------------------------------------------------------------------------------------------------------------------|----|
| <ul style="list-style-type: none"> <li>• Sampling strategy</li> </ul>                            | <p>Purposive sampling based on the eligibility criteria that required the patient to be at least 18 years at the time of the data collection, have at least one year history of accessing care in the ART unit before COVID-19, and at least one clinic visit during the pandemic.</p>                                                                                                                                                                                                                     | 5  |
| <ul style="list-style-type: none"> <li>• Ethical issues pertaining to human subjects</li> </ul>  | <p>The Cape Coast Teaching Hospital Ethics Review Committee gave approval for the study (CCTHERB/EC/2020/107). The study also complied with all the ethical considerations stipulated in the Declaration of Helsinki. Each participant gave both oral and written informed consent to participate in the study.</p>                                                                                                                                                                                        | 17 |
| <ul style="list-style-type: none"> <li>• Data collection methods</li> </ul>                      | <p>In-depth interviews were conducted in English and Fante (a local Ghanaian language predominantly spoken in the region). The interviews were conducted and audio-recorded by two researchers independently.</p>                                                                                                                                                                                                                                                                                          | 5  |
| <ul style="list-style-type: none"> <li>• Data collection instruments and technologies</li> </ul> | <p>Semi-structured interview guides were developed by the researchers based on the objectives of the study.</p>                                                                                                                                                                                                                                                                                                                                                                                            | 5  |
| <ul style="list-style-type: none"> <li>• Units of study</li> </ul>                               | <p>Each patient experience while accessing ART services during the COVID-19 pandemic was the unit of study. 12 participants experiences were explored and analysed.</p>                                                                                                                                                                                                                                                                                                                                    | 5  |
| <ul style="list-style-type: none"> <li>• Data processing</li> </ul>                              | <p>Verbatim transcription of the interviews was conducted. Back translation was done for the interviews conducted in Fante to ensure the essence of the participants' experiences were not lost during translation. Pseudonyms were used to de-identify the participants.</p>                                                                                                                                                                                                                              | 5  |
| <ul style="list-style-type: none"> <li>• Data analysis</li> </ul>                                | <p>Conceptual content analysis (14) was conducted. Both inductive and deductive analyses were done following the recommendations of Elo and Kyngäs (15) on deductive and Hsieh (16) on inductive content analysis. . Each team member independently read the participants' responses in the verbatim transcripts to identify patterns. The deductive analysis was conducted using the five concepts of accessing health care proposed by Penchansky &amp; Thomas (1981) as a lens to identify pattern.</p> | 5  |

|                                                                                         |                                                                                                                                                                                                                                                                                                                                                                                                                                                                                                                                                                                                                                                                                                                                                                                                                                                                                                                                                                                                                                                                                                                                                                                                                                                     |       |
|-----------------------------------------------------------------------------------------|-----------------------------------------------------------------------------------------------------------------------------------------------------------------------------------------------------------------------------------------------------------------------------------------------------------------------------------------------------------------------------------------------------------------------------------------------------------------------------------------------------------------------------------------------------------------------------------------------------------------------------------------------------------------------------------------------------------------------------------------------------------------------------------------------------------------------------------------------------------------------------------------------------------------------------------------------------------------------------------------------------------------------------------------------------------------------------------------------------------------------------------------------------------------------------------------------------------------------------------------------------|-------|
| <ul style="list-style-type: none"> <li>Techniques to enhance trustworthiness</li> </ul> | <p>Reliability and trustworthiness were maintained by establishing and following these decisions before the coding process; flexibility on the identification of all codes that had significant implication for the research question; and coding for the existence of a concept in a participant's transcript and not the frequency (the number of times it appears in a single transcript). Two researchers read the transcripts independently and conducted the initial open coding by labelling the meaningful units as codes to categorise the data. An audit trail was maintained throughout data collection and analysis.</p>                                                                                                                                                                                                                                                                                                                                                                                                                                                                                                                                                                                                                | 6     |
| <b>Results/findings</b>                                                                 |                                                                                                                                                                                                                                                                                                                                                                                                                                                                                                                                                                                                                                                                                                                                                                                                                                                                                                                                                                                                                                                                                                                                                                                                                                                     |       |
| <ul style="list-style-type: none"> <li>Syntheses and interpretation</li> </ul>          | <p>Five main concepts emerged from the data analysis: "Accessibility", "Availability", "Affordability", "Accommodation" and "Acceptability" Subthemes were generated under each major concept. The ART unit in the study setting remained opened for service delivery throughout the pandemic. However, the fear of contracting the virus while patronising ART services affected the participants decision to utilise the facility. Although, all the participants in this study reportedly honoured all their refill appointments, they indicated knowledge of other PLWH defaulted during the period. With reference to availability of resources, shortage of ARVs was reported affecting the refill appointment intervals. In spite of the challenges, several strategies were implemented to accommodate the patients' needs while protecting them from contracting the corona virus by instituting the stipulated COVID-protocol. The study found that some of the strategies impacted affordability of services as cost of transportation increased and also impacted acceptability of services. The study also found varied levels of accessibility to health workers providing ART services in the study setting during the pandemic.</p> | 2-3/7 |
| <ul style="list-style-type: none"> <li>Links to empirical data</li> </ul>               | <p><b>Theme 1: Accessibility</b></p> <ul style="list-style-type: none"> <li><b><i>ART clinic remained open</i></b></li> </ul> <p>From the narratives, all twelve participants indicated that the ART clinic remained open for service delivery throughout the pandemic. A participant stated:</p>                                                                                                                                                                                                                                                                                                                                                                                                                                                                                                                                                                                                                                                                                                                                                                                                                                                                                                                                                   | 8-15  |

|  |                                                                                                                                                                                                                                                                                                                                                                                                                                                                                                                                                                                                                                                                                                                                                                                                                                                                                                                                                                                                                                                                                                                                                                                                                                                                                                                                                                                                                                                                                                                                                                                                                                                                                                                                                                                                                                                                                                                                                                                                                                |  |
|--|--------------------------------------------------------------------------------------------------------------------------------------------------------------------------------------------------------------------------------------------------------------------------------------------------------------------------------------------------------------------------------------------------------------------------------------------------------------------------------------------------------------------------------------------------------------------------------------------------------------------------------------------------------------------------------------------------------------------------------------------------------------------------------------------------------------------------------------------------------------------------------------------------------------------------------------------------------------------------------------------------------------------------------------------------------------------------------------------------------------------------------------------------------------------------------------------------------------------------------------------------------------------------------------------------------------------------------------------------------------------------------------------------------------------------------------------------------------------------------------------------------------------------------------------------------------------------------------------------------------------------------------------------------------------------------------------------------------------------------------------------------------------------------------------------------------------------------------------------------------------------------------------------------------------------------------------------------------------------------------------------------------------------------|--|
|  | <p>“Even though the president said we should stay at home, they [health practitioners] were going to work... yes, so they were there [ART clinic]. (Ben, 18 years since HIV diagnosis)</p> <p>Several of the participants said, they received notification that the ART clinic was opened and were encouraged to access care when the need arose in spite of the order to stay at home. An excerpt read:</p> <p>“After the outbreak of the disease, everybody was frightened, but where I was treated, they [health workers] will say ‘you just come’.” (Esi, 10 years since HIV diagnosis)</p> <ul style="list-style-type: none"> <li>• <b><i>Fear affected patronage of services</i></b></li> </ul> <p>In spite of the fact that the ART clinic was opened during the pandemic, several of the narratives revealed that service patronage was initially curtailed. Several of the participants, expressed initial misgivings about accessing the ART clinic because of fear of contracting the virus.</p> <p>“I sometimes get worried that if I do not take care, I will be infected here [health facility].” (Oye, 17 years since HIV diagnosis)</p> <p>From the narratives, the participants’ fear was heightened by the knowledge that they had a greater risk of contracting the virus because of their HIV positive status.</p> <p>“My fear was that, maybe I might contract the virus because of my sickness [HIV status]. (Eko, 10 years since HIV diagnosis)</p> <p>Some participants’ fear of contracting the virus indicated misinformation about the modes of transmission.</p> <p>“My only fear was the sweat of another person touching my skin. Like me, some patients did not really come to the clinic because of the fear of getting the virus” (Aba, 17 years since HIV diagnosis)</p> <p>Thus, few participants reported being uncomfortable accessing HIV care in the health facility, while some participants suggested service delivery at home to minimise their presence in the health facility.</p> |  |
|--|--------------------------------------------------------------------------------------------------------------------------------------------------------------------------------------------------------------------------------------------------------------------------------------------------------------------------------------------------------------------------------------------------------------------------------------------------------------------------------------------------------------------------------------------------------------------------------------------------------------------------------------------------------------------------------------------------------------------------------------------------------------------------------------------------------------------------------------------------------------------------------------------------------------------------------------------------------------------------------------------------------------------------------------------------------------------------------------------------------------------------------------------------------------------------------------------------------------------------------------------------------------------------------------------------------------------------------------------------------------------------------------------------------------------------------------------------------------------------------------------------------------------------------------------------------------------------------------------------------------------------------------------------------------------------------------------------------------------------------------------------------------------------------------------------------------------------------------------------------------------------------------------------------------------------------------------------------------------------------------------------------------------------------|--|

|  |                                                                                                                                                                                                                                                                                                                                                                                                                                                                                                                                                                                                                                                                                                                                                                                                                                                                                                                                                                                                                                                                                                                                                                                                                                                                                                                                                                                                                                                                                                                                                                                                                                                                                                                                                                                                                                                                                                                                                                                                                           |  |
|--|---------------------------------------------------------------------------------------------------------------------------------------------------------------------------------------------------------------------------------------------------------------------------------------------------------------------------------------------------------------------------------------------------------------------------------------------------------------------------------------------------------------------------------------------------------------------------------------------------------------------------------------------------------------------------------------------------------------------------------------------------------------------------------------------------------------------------------------------------------------------------------------------------------------------------------------------------------------------------------------------------------------------------------------------------------------------------------------------------------------------------------------------------------------------------------------------------------------------------------------------------------------------------------------------------------------------------------------------------------------------------------------------------------------------------------------------------------------------------------------------------------------------------------------------------------------------------------------------------------------------------------------------------------------------------------------------------------------------------------------------------------------------------------------------------------------------------------------------------------------------------------------------------------------------------------------------------------------------------------------------------------------------------|--|
|  | <p>The fear was however minimised when they gathered the courage to attend the HIV clinic and realised that the COVID-19 protocols were being enforced.</p> <p>“My fear of contracting the virus was reduced because of the things [protocols] put in place to prevent COVID-19.” (Eko, 10 years since HIV diagnosis)</p> <ul style="list-style-type: none"> <li>• <b>Honouring appointments</b></li> </ul> <p>The narratives revealed that most of the participants did not default or miss a refill appointment during the pandemic. This was mainly attributed to a sense of duty and a need to preserve their health.</p> <p>“I know for sure I should come because it’s for my own benefit, no matter what the situation is” (Ben, 18 years since HIV diagnosis)</p> <p>A participant explained that although she personally did not honour her refill appointment during the pandemic on the advice of her family, she did not default because arrangements were made to ensure continued access to treatment.</p> <p>“I didn't come at all [to the health facility], because my Auntie was saying it is easy for us [PLWH] to get the sickness [COVID-19]. She said as for me because of my situation [HIV status], if I get the disease, it will be easy for me to die. So, I have to stay home and she will go to the hospital.” (Yaa, 13 years since HIV diagnosis)</p> <p>Familial and healthcare worker support was an integral part of continued access to care during the pandemic.</p> <p>“I sometimes leave the clinic and get some staff members to receive the drug on my behalf, after which I go for it at the individual’s residence.” (Aba, 17 years since HIV diagnosis)</p> <p>The participants commitment to access care in spite of their fears ran through most of the narratives.</p> <ul style="list-style-type: none"> <li>• <b>A few defaulters</b></li> </ul> <p>From the clients’ perspective, HIV service utilisation decreased at the onset of the pandemic. One participant said:</p> |  |
|--|---------------------------------------------------------------------------------------------------------------------------------------------------------------------------------------------------------------------------------------------------------------------------------------------------------------------------------------------------------------------------------------------------------------------------------------------------------------------------------------------------------------------------------------------------------------------------------------------------------------------------------------------------------------------------------------------------------------------------------------------------------------------------------------------------------------------------------------------------------------------------------------------------------------------------------------------------------------------------------------------------------------------------------------------------------------------------------------------------------------------------------------------------------------------------------------------------------------------------------------------------------------------------------------------------------------------------------------------------------------------------------------------------------------------------------------------------------------------------------------------------------------------------------------------------------------------------------------------------------------------------------------------------------------------------------------------------------------------------------------------------------------------------------------------------------------------------------------------------------------------------------------------------------------------------------------------------------------------------------------------------------------------------|--|

|  |                                                                                                                                                                                                                                                                                                                                                                                                                                                                                                                                                                                                                                                                                                                                                                                                                                                                                                                                                                                                                                                                                                                                                                                                                                                                                                                                                                                                                                                                                                                                                                                                                                                                                                                                                                                                                                                                                                                                                          |  |
|--|----------------------------------------------------------------------------------------------------------------------------------------------------------------------------------------------------------------------------------------------------------------------------------------------------------------------------------------------------------------------------------------------------------------------------------------------------------------------------------------------------------------------------------------------------------------------------------------------------------------------------------------------------------------------------------------------------------------------------------------------------------------------------------------------------------------------------------------------------------------------------------------------------------------------------------------------------------------------------------------------------------------------------------------------------------------------------------------------------------------------------------------------------------------------------------------------------------------------------------------------------------------------------------------------------------------------------------------------------------------------------------------------------------------------------------------------------------------------------------------------------------------------------------------------------------------------------------------------------------------------------------------------------------------------------------------------------------------------------------------------------------------------------------------------------------------------------------------------------------------------------------------------------------------------------------------------------------|--|
|  | <p>“During the initial stages of the pandemic, you will come here [HIV clinic] and you won't meet anybody [clients] and it's like, where are they?”<br/>(Ama, 2 years since HIV diagnosis)</p> <p>Some participants shared their awareness of some clients defaulting from HIV care during the pandemic, while others suggested the possibility of those clients accessing care in other facilities</p> <p>“I am from K [residence] and some of the patients I was coming with [ART clinic], no longer come.” (Afi, 10 years since HIV diagnosis)</p> <p>However, as the months progressed and the pandemic did not wane, clients reported to the facility for treatment refill. This increased the number of participants attending the clinic.</p> <p>“Yeah, I was shocked that huge numbers were coming.” (Ben, 18 years since HIV diagnosis)</p> <p><b>Theme 2: Availability</b></p> <ul style="list-style-type: none"> <li>• <b>ARV availability</b></li> </ul> <p>For clients who came to the clinic at the onset of the pandemic, they reported being supplied with the quantity of ARVs prescribed by the healthcare workers. Thus, these participants did not experience shortage of drugs.</p> <p>“Drugs were available... they were able to give me three (3) months stock.” (Eko, 10 years since HIV diagnosis)</p> <p>Some participants however, narrated instances when they were informed of shortage of some drugs at the HIV clinic. The shortage reportedly affected the quantity of ARVs supplied to the patients during their refill visit.</p> <p>“Before the disease [COVID-19], I was usually given medications that lasted for 5 months or 4 months but after the disease, I am being given 2 months. Recently, they said there is shortage of the medications so if you stay afar [residence], they give you a medication that will last for 1 month but if you are near, they give you a medication that will last for two</p> |  |
|--|----------------------------------------------------------------------------------------------------------------------------------------------------------------------------------------------------------------------------------------------------------------------------------------------------------------------------------------------------------------------------------------------------------------------------------------------------------------------------------------------------------------------------------------------------------------------------------------------------------------------------------------------------------------------------------------------------------------------------------------------------------------------------------------------------------------------------------------------------------------------------------------------------------------------------------------------------------------------------------------------------------------------------------------------------------------------------------------------------------------------------------------------------------------------------------------------------------------------------------------------------------------------------------------------------------------------------------------------------------------------------------------------------------------------------------------------------------------------------------------------------------------------------------------------------------------------------------------------------------------------------------------------------------------------------------------------------------------------------------------------------------------------------------------------------------------------------------------------------------------------------------------------------------------------------------------------------------|--|



|  |                                                                                                                                                                                                                                                                                                                                                                                                                                                                                                                                                                                                                                                                                                                                                                                                                                                                                                                                                                                                                                                                                                                                                                                                                                                                                                                                                                                                                                                                                                                                                                                                                                                                                                                                                                                                                                                                                                                                                |  |
|--|------------------------------------------------------------------------------------------------------------------------------------------------------------------------------------------------------------------------------------------------------------------------------------------------------------------------------------------------------------------------------------------------------------------------------------------------------------------------------------------------------------------------------------------------------------------------------------------------------------------------------------------------------------------------------------------------------------------------------------------------------------------------------------------------------------------------------------------------------------------------------------------------------------------------------------------------------------------------------------------------------------------------------------------------------------------------------------------------------------------------------------------------------------------------------------------------------------------------------------------------------------------------------------------------------------------------------------------------------------------------------------------------------------------------------------------------------------------------------------------------------------------------------------------------------------------------------------------------------------------------------------------------------------------------------------------------------------------------------------------------------------------------------------------------------------------------------------------------------------------------------------------------------------------------------------------------|--|
|  | <p>weeks or 1 week.” (Oye, 17 years since HIV diagnosis)</p> <p>Two participants intimated that their treatment regimen was changed during the COVID-19 pandemic. “Some of my drugs were changed. They [healthcare professionals] said the drugs were changed because of the COVID.” (Yaa, 13 years since HIV diagnosis)</p> <p><b>Theme 3: Affordability</b></p> <ul style="list-style-type: none"> <li>• <i>Unbudgeted Cost: Acquiring PPEs and medication</i></li> </ul> <p>From the participants, the increased cost of PPEs, which was a requirement for being allowed access to the facility, also hindered their utilisation of HIV services during the pandemic.</p> <p>“You know sanitizers that we usually weren't using became so expensive. In this case, how do you expect a layman to buy? He won't buy, and that's a risk not to himself alone but to everybody.” (Ama, 2 years since HIV diagnosis)</p> <p>A few participants also indicated that they incurred cost in acquiring some medications that were not dispensed at the HIV clinic due to the pandemic. This they purported was not the case prior to the pandemic.</p> <p>“Sometimes when you come, there will be no Septrin so they will prescribe it for you to buy it outside. If you don't have money to buy you stop. The last time I came, I couldn't afford Septrin so I have not taken some till now. This COVID has really caused problems.” (Esi, 10 years since HIV diagnosis)</p> <p>From the narratives, under-utilisation of HIV services was attributed to patients being turned away from the health facility when they did not present in PPEs. A participant narrated:</p> <p>“They [health providers] weren't giving us the masks initially. So, if you come [hospital] and you don't have a mask, you will not be allowed to enter the hospital.... So, the nurses can't take care of you. So, go home.” (Ama, 2 years since HIV diagnosis)</p> |  |
|--|------------------------------------------------------------------------------------------------------------------------------------------------------------------------------------------------------------------------------------------------------------------------------------------------------------------------------------------------------------------------------------------------------------------------------------------------------------------------------------------------------------------------------------------------------------------------------------------------------------------------------------------------------------------------------------------------------------------------------------------------------------------------------------------------------------------------------------------------------------------------------------------------------------------------------------------------------------------------------------------------------------------------------------------------------------------------------------------------------------------------------------------------------------------------------------------------------------------------------------------------------------------------------------------------------------------------------------------------------------------------------------------------------------------------------------------------------------------------------------------------------------------------------------------------------------------------------------------------------------------------------------------------------------------------------------------------------------------------------------------------------------------------------------------------------------------------------------------------------------------------------------------------------------------------------------------------|--|

|  |                                                                                                                                                                                                                                                                                                                                                                                                                                                                                                                                                                                                                                                                                                                                                                                                                                                                                                                                                                                                                                                                                                                                                                                                                                                                                                                                                                                                                                                                                                                                                                                                                                                                                                                                                                                                                                                               |  |
|--|---------------------------------------------------------------------------------------------------------------------------------------------------------------------------------------------------------------------------------------------------------------------------------------------------------------------------------------------------------------------------------------------------------------------------------------------------------------------------------------------------------------------------------------------------------------------------------------------------------------------------------------------------------------------------------------------------------------------------------------------------------------------------------------------------------------------------------------------------------------------------------------------------------------------------------------------------------------------------------------------------------------------------------------------------------------------------------------------------------------------------------------------------------------------------------------------------------------------------------------------------------------------------------------------------------------------------------------------------------------------------------------------------------------------------------------------------------------------------------------------------------------------------------------------------------------------------------------------------------------------------------------------------------------------------------------------------------------------------------------------------------------------------------------------------------------------------------------------------------------|--|
|  | <ul style="list-style-type: none"> <li> <p><b>Increased cost of transportation</b></p> <p>Few participants commented on the financial burden incurred while accessing HIV care during the pandemic. This cost was mainly attributed to the need to honour more refill appointments as a result of shortage of ARVs and the limited amount dispensed at a time by the pharmacy.</p> <p>“That place [residence] is very far. Before COVID, they pharmacists] gave me quantities that would last for 6 months. If you don't get 3 months quantity, you have to be coming here [HIV clinic] every month? So, now that they want to give us the drug on weekly basis, I have to come again. It has brought me a problem. I was thinking a lot so I came after my review date [defaulted on appointment date].” (Pra, 12 years since HIV diagnosis)</p> <p>“Sometimes when you are coming you might not have money on you even for transport but you will try and come.” (Esi, 10 years since HIV diagnosis)</p> </li> </ul> <p><b>Theme 4: Accommodation</b></p> <p><i>Implementation of COVID protocols in the HIV clinic</i></p> <p>According to the participants, the COVID-19 protocols were instituted in the HIV clinic and monitored to ensure that patients complied with the directives.</p> <p>“They were following the protocols that the president gave. They have provided Veronica Bucket at the entrance of the hospital, where you wash your hands. They use the thermometer gun to check your temperature. They are adhering to the safety protocols.” (Ben, 18 years since HIV diagnosis)</p> <p>“Initially [before Covid-19], we used to sit very close to each other at the clinic. But during the pandemic, we observe social distancing when we come to the clinic. The nurses ensure that you have washed your hands, sanitized and are</p> |  |
|--|---------------------------------------------------------------------------------------------------------------------------------------------------------------------------------------------------------------------------------------------------------------------------------------------------------------------------------------------------------------------------------------------------------------------------------------------------------------------------------------------------------------------------------------------------------------------------------------------------------------------------------------------------------------------------------------------------------------------------------------------------------------------------------------------------------------------------------------------------------------------------------------------------------------------------------------------------------------------------------------------------------------------------------------------------------------------------------------------------------------------------------------------------------------------------------------------------------------------------------------------------------------------------------------------------------------------------------------------------------------------------------------------------------------------------------------------------------------------------------------------------------------------------------------------------------------------------------------------------------------------------------------------------------------------------------------------------------------------------------------------------------------------------------------------------------------------------------------------------------------|--|

|  |                                                                                                                                                                                                                                                                                                                                                                                                                                                                                                                                                                                                                                                                                                                                                                                                                                                                                                                                                                                                                                                                                                                                                                                                                                                                                                                                                                                                                                                                                                                                                                                                                                                                                                       |  |
|--|-------------------------------------------------------------------------------------------------------------------------------------------------------------------------------------------------------------------------------------------------------------------------------------------------------------------------------------------------------------------------------------------------------------------------------------------------------------------------------------------------------------------------------------------------------------------------------------------------------------------------------------------------------------------------------------------------------------------------------------------------------------------------------------------------------------------------------------------------------------------------------------------------------------------------------------------------------------------------------------------------------------------------------------------------------------------------------------------------------------------------------------------------------------------------------------------------------------------------------------------------------------------------------------------------------------------------------------------------------------------------------------------------------------------------------------------------------------------------------------------------------------------------------------------------------------------------------------------------------------------------------------------------------------------------------------------------------|--|
|  | <p>in your nose mask.” (Eko, 10 years since HIV diagnosis)</p> <p><i>Increased education on Covid-19 protocols</i></p> <p>The participants intimated there was increased education on COVID-19 and the safety protocols at the clinic.</p> <p>“They educate us on social distancing and COVID-19 prevention protocols... They tell us to wash our hands, and put on nose mask to prevent us from being infected.” (Aku, 2 years since HIV diagnosis)</p> <p>The education that participants received on COVID-19 empowered them to take responsibility of their own safety.</p> <p>“The only change is we protecting ourselves from being infected. The health care workers explained it to us.” (Oye, 17 years since HIV diagnosis)</p> <p><i>Adherence to safety protocols</i></p> <p>Although, majority of the participants alluded to a general compliance to the protocols, some narratives revealed that there were instances of nonadherence to the protocols instituted to protect staff and patients from contracting COVID-19. This was attributed to lack of understanding and limited education on the protocols.</p> <p>“They [healthcare professionals] were wearing their mask... and nobody talks to you [client] about your mask. For me, I feel the understanding wasn’t there. They [healthcare professionals] say wear mask, so, when somebody [client] gets tired, he takes it off.” (Ama, 2 years since HIV diagnosis)</p> <p>Another participant intimated that the healthcare professionals did not adhere to some of the safety protocols they educated the clients on and suggested action should be taken to ensure that the health staff complied with the protocols.</p> |  |
|--|-------------------------------------------------------------------------------------------------------------------------------------------------------------------------------------------------------------------------------------------------------------------------------------------------------------------------------------------------------------------------------------------------------------------------------------------------------------------------------------------------------------------------------------------------------------------------------------------------------------------------------------------------------------------------------------------------------------------------------------------------------------------------------------------------------------------------------------------------------------------------------------------------------------------------------------------------------------------------------------------------------------------------------------------------------------------------------------------------------------------------------------------------------------------------------------------------------------------------------------------------------------------------------------------------------------------------------------------------------------------------------------------------------------------------------------------------------------------------------------------------------------------------------------------------------------------------------------------------------------------------------------------------------------------------------------------------------|--|

|  |                                                                                                                                                                                                                                                                                                                                                                                                                                                                                                                                                                                                                                                                                                                                                                                                                                                                                                                                                                                                                                                                                                                                                                                                                                                                                                                                                                                                                                                                                                                                                                                                                                                                                                                                                                                                                                                                                                                                                                                                               |  |
|--|---------------------------------------------------------------------------------------------------------------------------------------------------------------------------------------------------------------------------------------------------------------------------------------------------------------------------------------------------------------------------------------------------------------------------------------------------------------------------------------------------------------------------------------------------------------------------------------------------------------------------------------------------------------------------------------------------------------------------------------------------------------------------------------------------------------------------------------------------------------------------------------------------------------------------------------------------------------------------------------------------------------------------------------------------------------------------------------------------------------------------------------------------------------------------------------------------------------------------------------------------------------------------------------------------------------------------------------------------------------------------------------------------------------------------------------------------------------------------------------------------------------------------------------------------------------------------------------------------------------------------------------------------------------------------------------------------------------------------------------------------------------------------------------------------------------------------------------------------------------------------------------------------------------------------------------------------------------------------------------------------------------|--|
|  | <p>“Some don't put on the mask when working or the mask is on their chin. But they want you the patient to put on your mask. Talk to them to change their attitude because they can't tell us to put it on while theirs are not on.” (Yaa, 13 years since HIV diagnosis)</p> <ul style="list-style-type: none"> <li>• <b>The Downsides</b></li> </ul> <p>For many of the participants, service delivery in the clinic was affected by the pandemic. These included reported issues of overcrowding and long waiting time.</p> <p><i>Overcrowding</i></p> <p>Participants indicated that as the pandemic waged on, the number of patients' visiting the clinic increased. This resulted in congestion in the HIV unit raising a source of concern for clients accessing care at the HIV clinic. To avoid the risk of getting infected with COVID-19, some participants therefore decided not to honour their refill appointments.</p> <p>“They [patients] really come in their numbers despite the pandemic.” (Aku, 2 years since HIV diagnosis)</p> <p>“I will say that crowding in this particular era [COVID-19] isn't the best.” (Ama, 2 years since HIV diagnosis)</p> <p><i>Long waiting time</i></p> <p>Participants indicated that the long waiting times increased their risk of contracting the virus. This related to lack of clear pathways in service delivery to meet the needs of the various categories of patients.</p> <p>“The more the waiting time, the riskier. I am waiting here because I have to go for my vital signs and then they [nurses] will decide if I have to see a doctor. I think it's time wasting. At least they should speed after the usual check-up.” (Ama, 2 years since HIV diagnosis)</p> <p>For others also, delays were experienced at the pharmacy. This was attributed to few staff assigned to serve the drugs.</p> <p>“My only challenge had to do with the waiting time for the drugs. I spend more time to be served my drug. I suggest that management</p> |  |
|--|---------------------------------------------------------------------------------------------------------------------------------------------------------------------------------------------------------------------------------------------------------------------------------------------------------------------------------------------------------------------------------------------------------------------------------------------------------------------------------------------------------------------------------------------------------------------------------------------------------------------------------------------------------------------------------------------------------------------------------------------------------------------------------------------------------------------------------------------------------------------------------------------------------------------------------------------------------------------------------------------------------------------------------------------------------------------------------------------------------------------------------------------------------------------------------------------------------------------------------------------------------------------------------------------------------------------------------------------------------------------------------------------------------------------------------------------------------------------------------------------------------------------------------------------------------------------------------------------------------------------------------------------------------------------------------------------------------------------------------------------------------------------------------------------------------------------------------------------------------------------------------------------------------------------------------------------------------------------------------------------------------------|--|

|  |                                                                                                                                                                                                                                                                                                                                                                                                                                                                                                                                                                                                                                                                                                                                                                                                                                                                                                                                                                                                                                                                                                                                                                                                                                                                                                                                                                                                                                                                                                                                                                                                                                                                               |  |
|--|-------------------------------------------------------------------------------------------------------------------------------------------------------------------------------------------------------------------------------------------------------------------------------------------------------------------------------------------------------------------------------------------------------------------------------------------------------------------------------------------------------------------------------------------------------------------------------------------------------------------------------------------------------------------------------------------------------------------------------------------------------------------------------------------------------------------------------------------------------------------------------------------------------------------------------------------------------------------------------------------------------------------------------------------------------------------------------------------------------------------------------------------------------------------------------------------------------------------------------------------------------------------------------------------------------------------------------------------------------------------------------------------------------------------------------------------------------------------------------------------------------------------------------------------------------------------------------------------------------------------------------------------------------------------------------|--|
|  | <p>increases the number people who distribute the drug at the pharmacy in order to reduce the waiting time” (Eko, 10 years since HIV diagnosis)</p> <p>Some participants attributed the long waiting time to a reduction in the number of healthcare professionals providing services in the HIV clinic during the pandemic.</p> <p>“They have reduced in number. If they were six, they are now four.” (Oye, 17 years since HIV diagnosis)</p> <p>“I know they said they were running shift, so it reduced the number of doctors and nurses available. The pharmacists reduced in number. I only saw two guys there... I think they should be faster in the activities because they delay us.” (Ben, 18 years since HIV diagnosis)</p> <p>A participant alluded to a decline in the quality of services received.</p> <p>“It [COVID-19] affected the quality of services [HIV] we have.” (Bob, 7 years since HIV diagnosis)</p> <p><b>Theme 5: Acceptability</b></p> <p><i>Access to the healthcare professionals</i></p> <p>From the narratives, most of the participants continued to have positive experience with the healthcare workers even in the pandemic. Abi, a 65-year-old woman who had lived with HIV for three years said:</p> <p>“The doctors and the nurses come always and when we meet their absence, they inform us that they were doing something elsewhere so they will be with us shortly. For me, I come and meet them every day.” (Abi, 3 years since HIV diagnosis)</p> <p>Some participants, however, bemoaned the pandemic had affected access to the healthcare professionals in the HIV clinic and struggled to cope with the many changes.</p> |  |
|--|-------------------------------------------------------------------------------------------------------------------------------------------------------------------------------------------------------------------------------------------------------------------------------------------------------------------------------------------------------------------------------------------------------------------------------------------------------------------------------------------------------------------------------------------------------------------------------------------------------------------------------------------------------------------------------------------------------------------------------------------------------------------------------------------------------------------------------------------------------------------------------------------------------------------------------------------------------------------------------------------------------------------------------------------------------------------------------------------------------------------------------------------------------------------------------------------------------------------------------------------------------------------------------------------------------------------------------------------------------------------------------------------------------------------------------------------------------------------------------------------------------------------------------------------------------------------------------------------------------------------------------------------------------------------------------|--|

|                                                                                                    |                                                                                                                                                                                                                                                                                                                                                                                                                                                                                                                                                                                                                                                                                                                                                                                                                                                                                                                                                                                                                                                                                                                                                                                                                                                                                                                                                                                                                                                                                                                                                                                                                                                                                                                                                                                                                                                                                                                                                                                              |              |
|----------------------------------------------------------------------------------------------------|----------------------------------------------------------------------------------------------------------------------------------------------------------------------------------------------------------------------------------------------------------------------------------------------------------------------------------------------------------------------------------------------------------------------------------------------------------------------------------------------------------------------------------------------------------------------------------------------------------------------------------------------------------------------------------------------------------------------------------------------------------------------------------------------------------------------------------------------------------------------------------------------------------------------------------------------------------------------------------------------------------------------------------------------------------------------------------------------------------------------------------------------------------------------------------------------------------------------------------------------------------------------------------------------------------------------------------------------------------------------------------------------------------------------------------------------------------------------------------------------------------------------------------------------------------------------------------------------------------------------------------------------------------------------------------------------------------------------------------------------------------------------------------------------------------------------------------------------------------------------------------------------------------------------------------------------------------------------------------------------|--------------|
|                                                                                                    | <p>“It was really difficult because you may not get access to the nurses or doctors because the COVID-19 was really popping up and everything has been restricted here, the way you sit, everything has been changed.” (Ben, 18 years since HIV diagnosis)</p>                                                                                                                                                                                                                                                                                                                                                                                                                                                                                                                                                                                                                                                                                                                                                                                                                                                                                                                                                                                                                                                                                                                                                                                                                                                                                                                                                                                                                                                                                                                                                                                                                                                                                                                               |              |
| <b>Discussion</b>                                                                                  |                                                                                                                                                                                                                                                                                                                                                                                                                                                                                                                                                                                                                                                                                                                                                                                                                                                                                                                                                                                                                                                                                                                                                                                                                                                                                                                                                                                                                                                                                                                                                                                                                                                                                                                                                                                                                                                                                                                                                                                              |              |
| <p>Integration with prior work, implications, transferability and contribution(s) to the field</p> | <p>Following exploration of the concept of availability of services, the study findings revealed that the ART clinic remained open during the pandemic. Thus, most of the participants in this study did not miss ART refill appointments or defaulted from care. Similar findings were reported in South Africa (19) and Malawi (20). For those who could not honour their appointments, alternative measures mainly associated with a vibrant family support system, and a need to preserve their health ensured treatment was not interrupted. Although the services were available, there were instances of ARV stock-out, resulting in the pharmacy under-supplying the prescribed dosage. Several modelling studies projected disruption in ART supply and distribution during pandemics (21,22). Regarding accessibility, the study found that instituting lockdown to curb the spread of the virus (11) affected geographical access to ART service. Although, this was not a general phenomenon, several clients remained indoors to minimise the risk of contracting the virus. Some participants knew PLWH who defaulted during the pandemic. Similar findings were recorded in Kigali, Rwanda where 52% of clients in an ART clinic missed refill appointments (23). These treatment interruptions can contribute to compromised immunologic and virologic outcomes, and adherence failure once ART is reintroduced (24,25). This can further reverse the country’s gains in achieving the second and third, 90-90-90 targets (4). Hence the pandemic affected access to ART and measures such as case managers attending home visits to supply treatment during future pandemics can be explored to reduce the instances of treatment interruptions. Furthermore, the study findings revealed that several strategies were implemented at the ART clinic during the pandemic. It was evident that reporting for refill appointments was an opportunity to receive education</p> | <p>15-16</p> |

|              |                                                                                                                                                                                                                                                                                                                                                                                                                                                                                                                                                                                                                                                                                                                                                                                                                                                                                                                                                                                                                                                                                                                                                                                                                                                                                                                                                                                                                                                                                                                                                                                                                                                                                                                                                                                                                                                                                                                                                                                                                                                |    |
|--------------|------------------------------------------------------------------------------------------------------------------------------------------------------------------------------------------------------------------------------------------------------------------------------------------------------------------------------------------------------------------------------------------------------------------------------------------------------------------------------------------------------------------------------------------------------------------------------------------------------------------------------------------------------------------------------------------------------------------------------------------------------------------------------------------------------------------------------------------------------------------------------------------------------------------------------------------------------------------------------------------------------------------------------------------------------------------------------------------------------------------------------------------------------------------------------------------------------------------------------------------------------------------------------------------------------------------------------------------------------------------------------------------------------------------------------------------------------------------------------------------------------------------------------------------------------------------------------------------------------------------------------------------------------------------------------------------------------------------------------------------------------------------------------------------------------------------------------------------------------------------------------------------------------------------------------------------------------------------------------------------------------------------------------------------------|----|
|              | <p>on COVID-19 safety protocols. Health education has been noted to positively impact health-seeking behaviour and improve patients' health literacy (20,26), which is especially necessary for PLWH since they have a higher risk of getting infected with the corona virus (27). Also, the study revealed strict adherence to some of the safety protocols clinic such as handwashing and wearing of face mask at the ART clinic. This finding is in congruence with another study by Neuwirth, Mattner, &amp; Otchwemah, (28) that reported a significantly high adherence to COVID-19 protocols in a German hospital.</p> <p>However, other protocols such as social distancing was not maintained as the findings indicated overcrowding at the unit in several instances. Furthermore, ARV stock-out resulted in limited dispensing, changes in clients' treatment regimen and shorter refill appointments, that required the patients to report to the clinic more frequently during the pandemic; increasing the financial cost of accessing care than they did previously. Although ART service delivery was structured to accommodate the challenges that the pandemic presented to the health system and the clients, there is the need to establish appropriate contingency strategies to ensure continuous access to ART care during future pandemics.</p> <p>The study also recorded that the pandemic and protocols required to minimise the risk of infection impacted the patients' ability to readily access health workers providing ART services. For some clients, the health workers continued to exhibit positive and welcoming attitudes. Similar studies conducted in Ghana prior to the pandemic reported that PLWH having continuous access to the health workers providing ART services positively impacted their retention in care and adherence to treatment (29). It is therefore important to identify strategies to enhance health worker-patient engagement in times when physical distance is required.</p> |    |
| Limitations  | Possibility of social desirability bias in highlighting participants' access to ART services could not be excluded as majority of the patients were old patients of the clinic.                                                                                                                                                                                                                                                                                                                                                                                                                                                                                                                                                                                                                                                                                                                                                                                                                                                                                                                                                                                                                                                                                                                                                                                                                                                                                                                                                                                                                                                                                                                                                                                                                                                                                                                                                                                                                                                                | 16 |
| <b>Other</b> |                                                                                                                                                                                                                                                                                                                                                                                                                                                                                                                                                                                                                                                                                                                                                                                                                                                                                                                                                                                                                                                                                                                                                                                                                                                                                                                                                                                                                                                                                                                                                                                                                                                                                                                                                                                                                                                                                                                                                                                                                                                |    |

|                       |                                                            |   |
|-----------------------|------------------------------------------------------------|---|
| Conflicts of interest | The authors declare that they have no competing interests. | 3 |
| Funding               | Funded by the individual researchers                       | 3 |
